# Supplementary material
Source: PubMed Central journal article supplement (PMC9050955)
Supplement: NIHMS1789222-supplement-19.pdf [file NIHMS1789222-supplement-19.pdf]

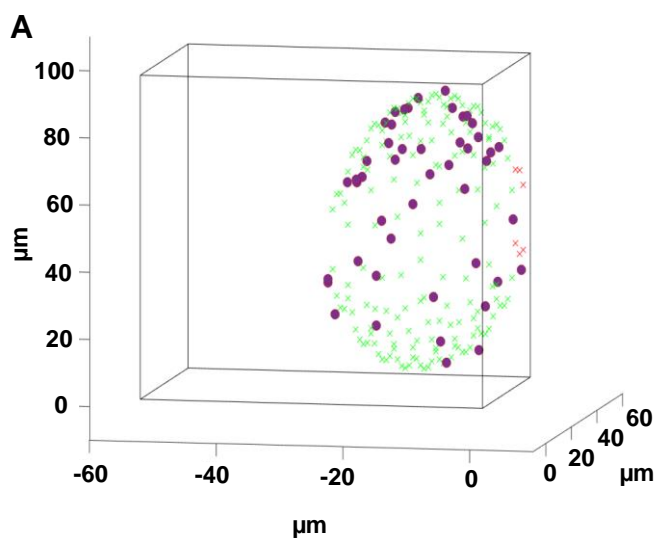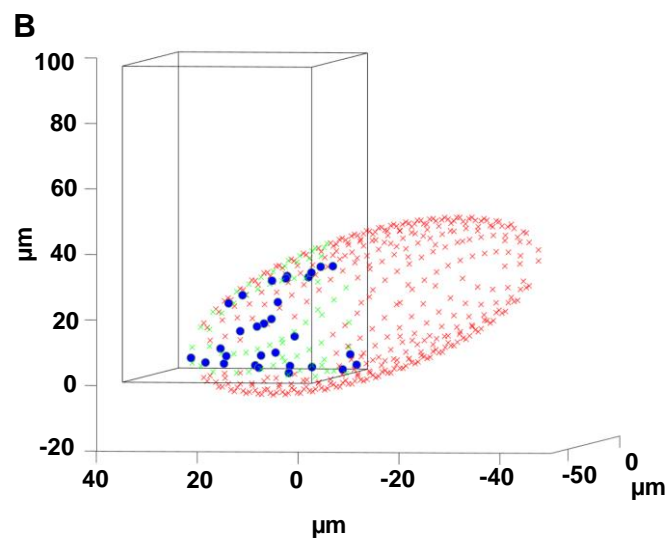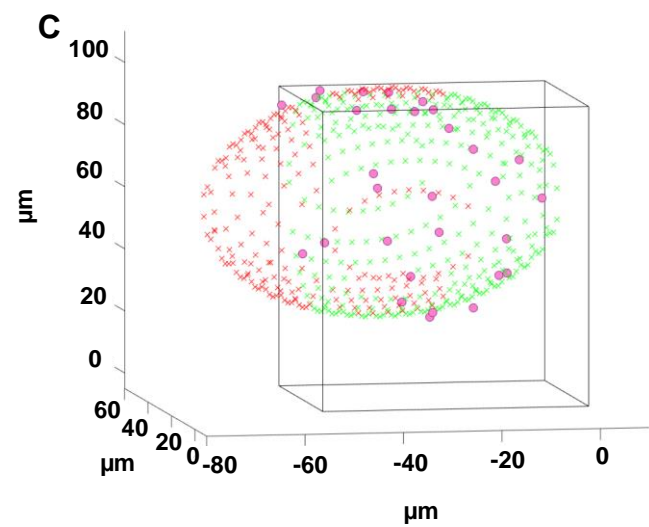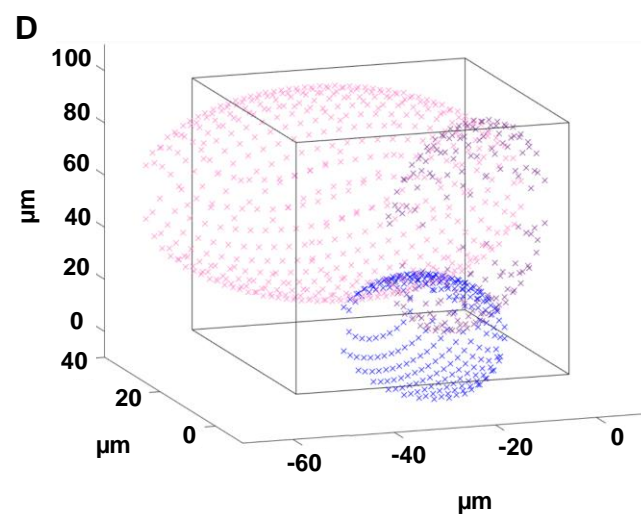

**Figure S1**, Aten et al., 2021

**A**

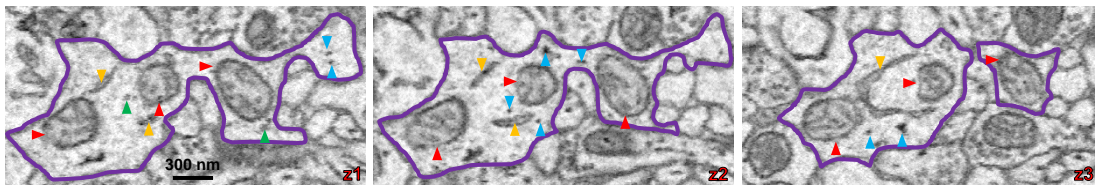

**B**

| Vesicle-like organelles                                                                                                                                               | Endoplasmic reticulum                                                                                                                               | Glycogen granules                                                                                                                                                                                            | Mitochondria                                                                                                                                                                                                                                                                                |
|-----------------------------------------------------------------------------------------------------------------------------------------------------------------------|-----------------------------------------------------------------------------------------------------------------------------------------------------|--------------------------------------------------------------------------------------------------------------------------------------------------------------------------------------------------------------|---------------------------------------------------------------------------------------------------------------------------------------------------------------------------------------------------------------------------------------------------------------------------------------------|
| <ul style="list-style-type: none"> <li>Typically circular in shape</li> <li>Approximately 30-75 nm in diameter</li> <li>Persists in only one 2D EM z-plane</li> </ul> | <ul style="list-style-type: none"> <li>Visible cisternae</li> <li>Varied in size/shape</li> <li>Persists through multiple 2D EM z-planes</li> </ul> | <ul style="list-style-type: none"> <li>Typically irregular in shape and can form clusters</li> <li>Individual granules approximately 10-40 nm in diameter</li> <li>Dark in color (electron dense)</li> </ul> | <ul style="list-style-type: none"> <li>Notable inner membrane infoldings (i.e. cristae)</li> <li>Presence of mitochondrial matrix</li> <li>Apparent mitochondrial membrane (inner and outer)</li> <li>Typically larger in size</li> <li>Persists through multiple 2D EM z-planes</li> </ul> |

**Figure S2**, Aten et al., 2021

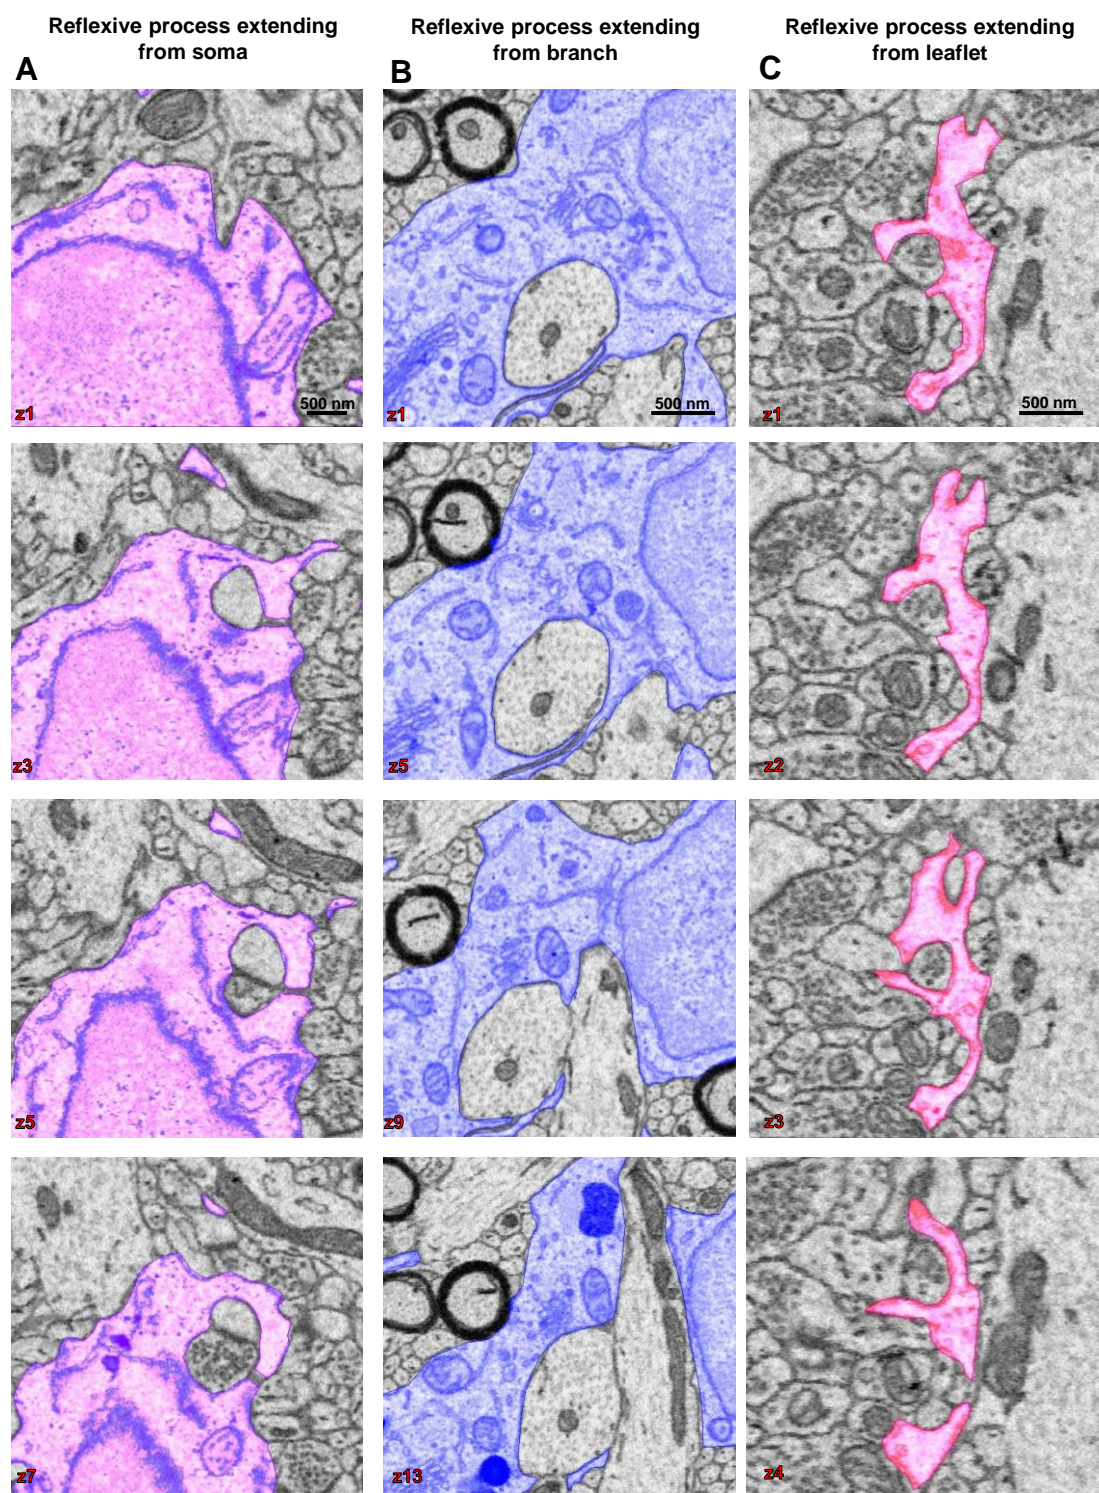

**Figure S3**, Aten et al., 2021

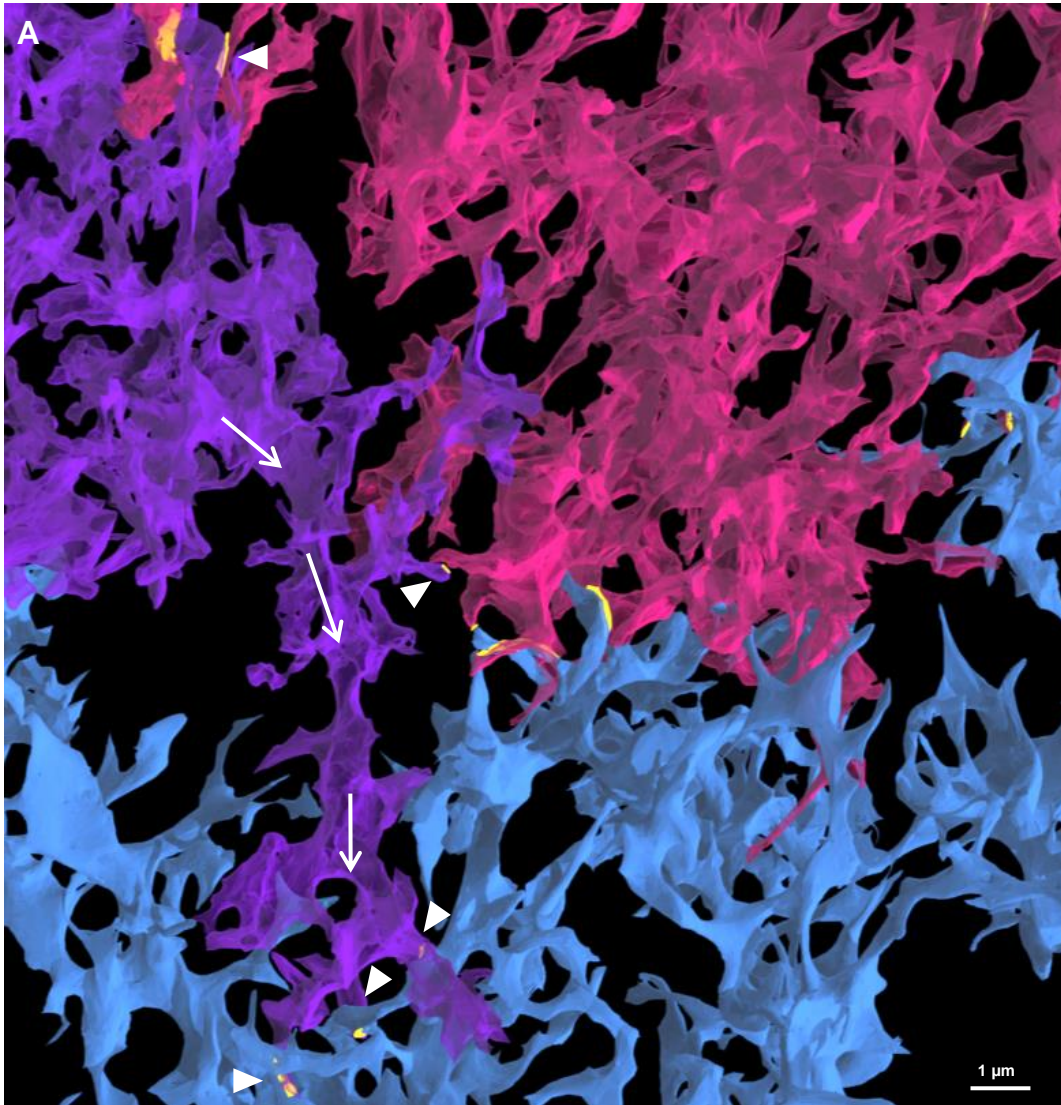

**Figure S4**, Aten et al., 2021

**A**

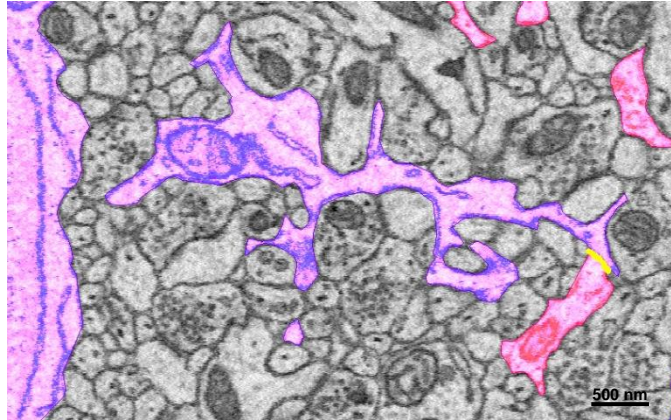

**B**

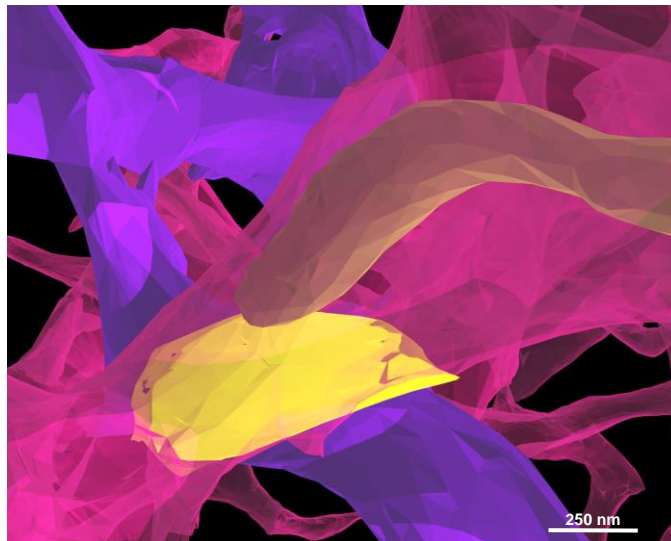

**Figure S5**, Aten et al., 2021

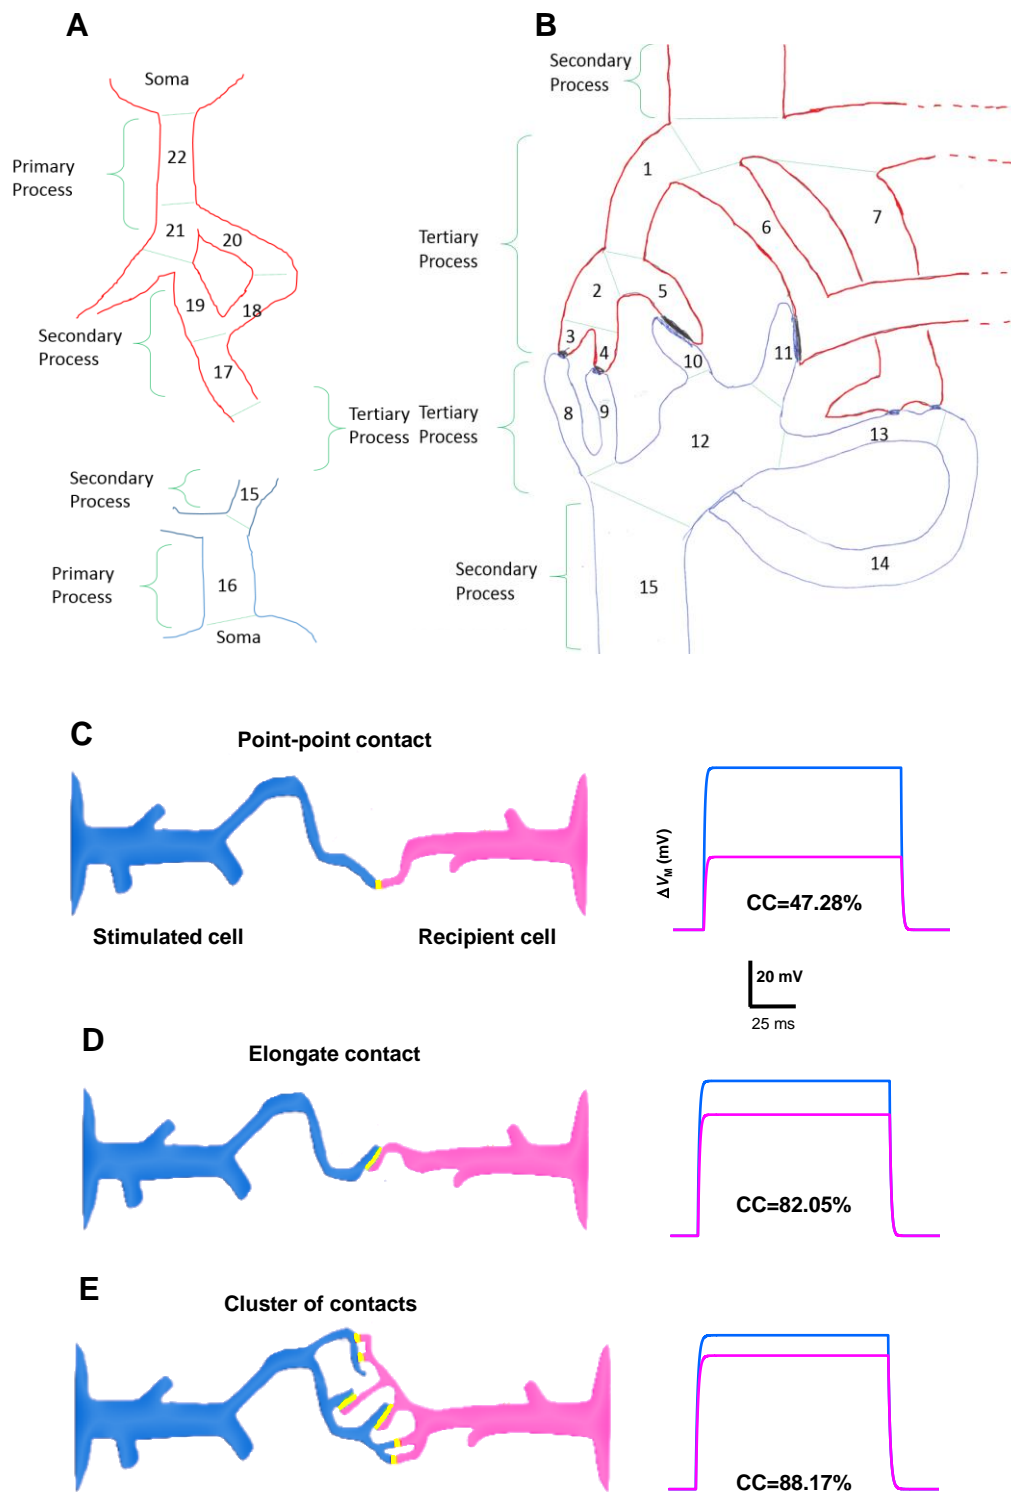

**Figure S6**, Aten et al., 2021

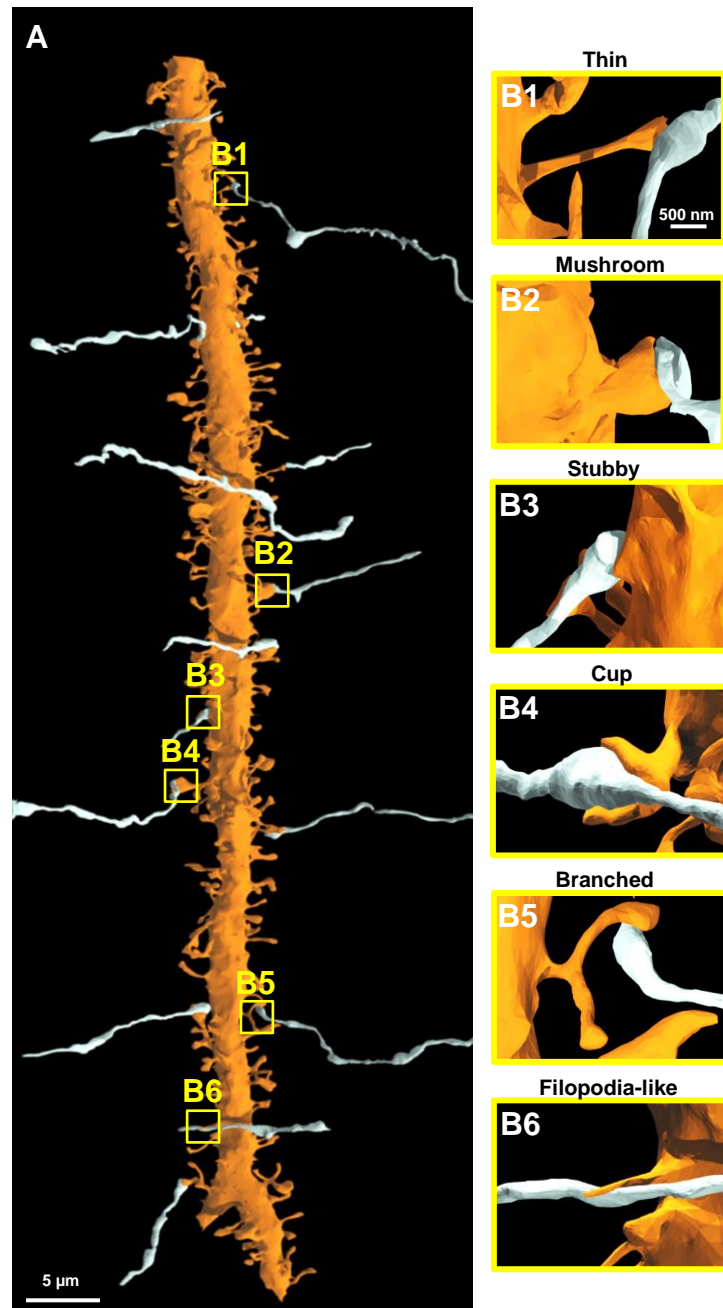

**Figure S7**, Aten et al., 2021

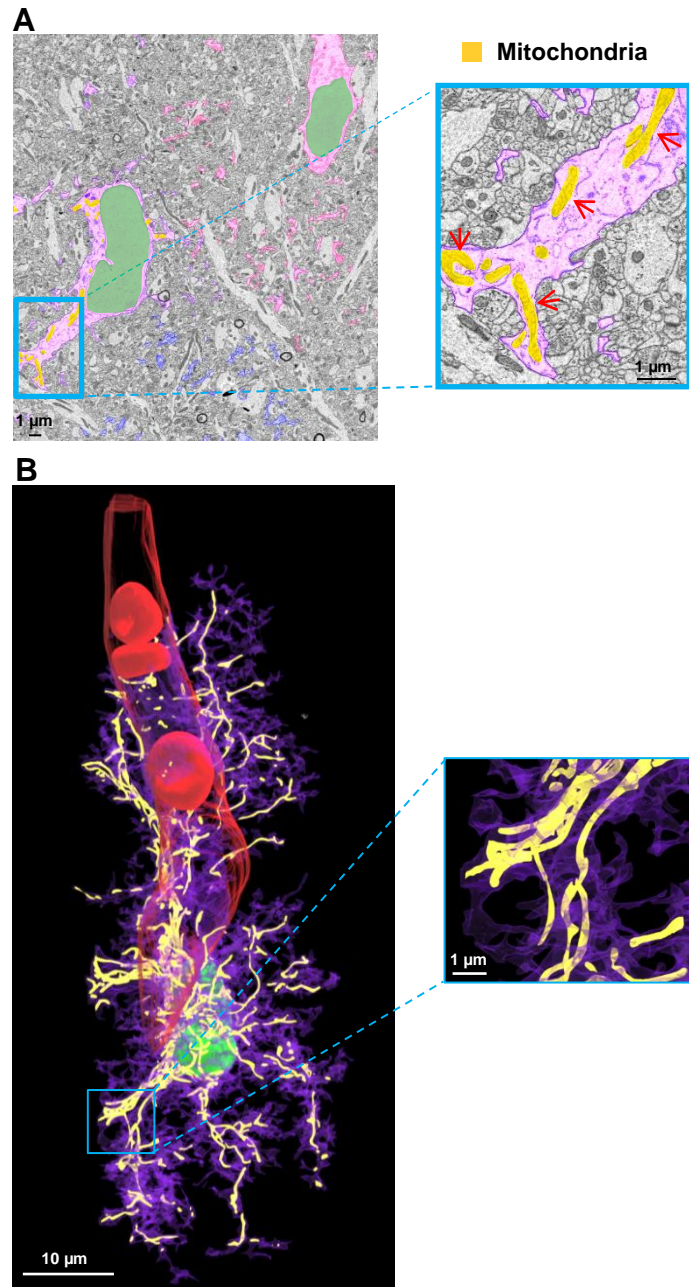

**Figure S8**, Aten et al., 2021

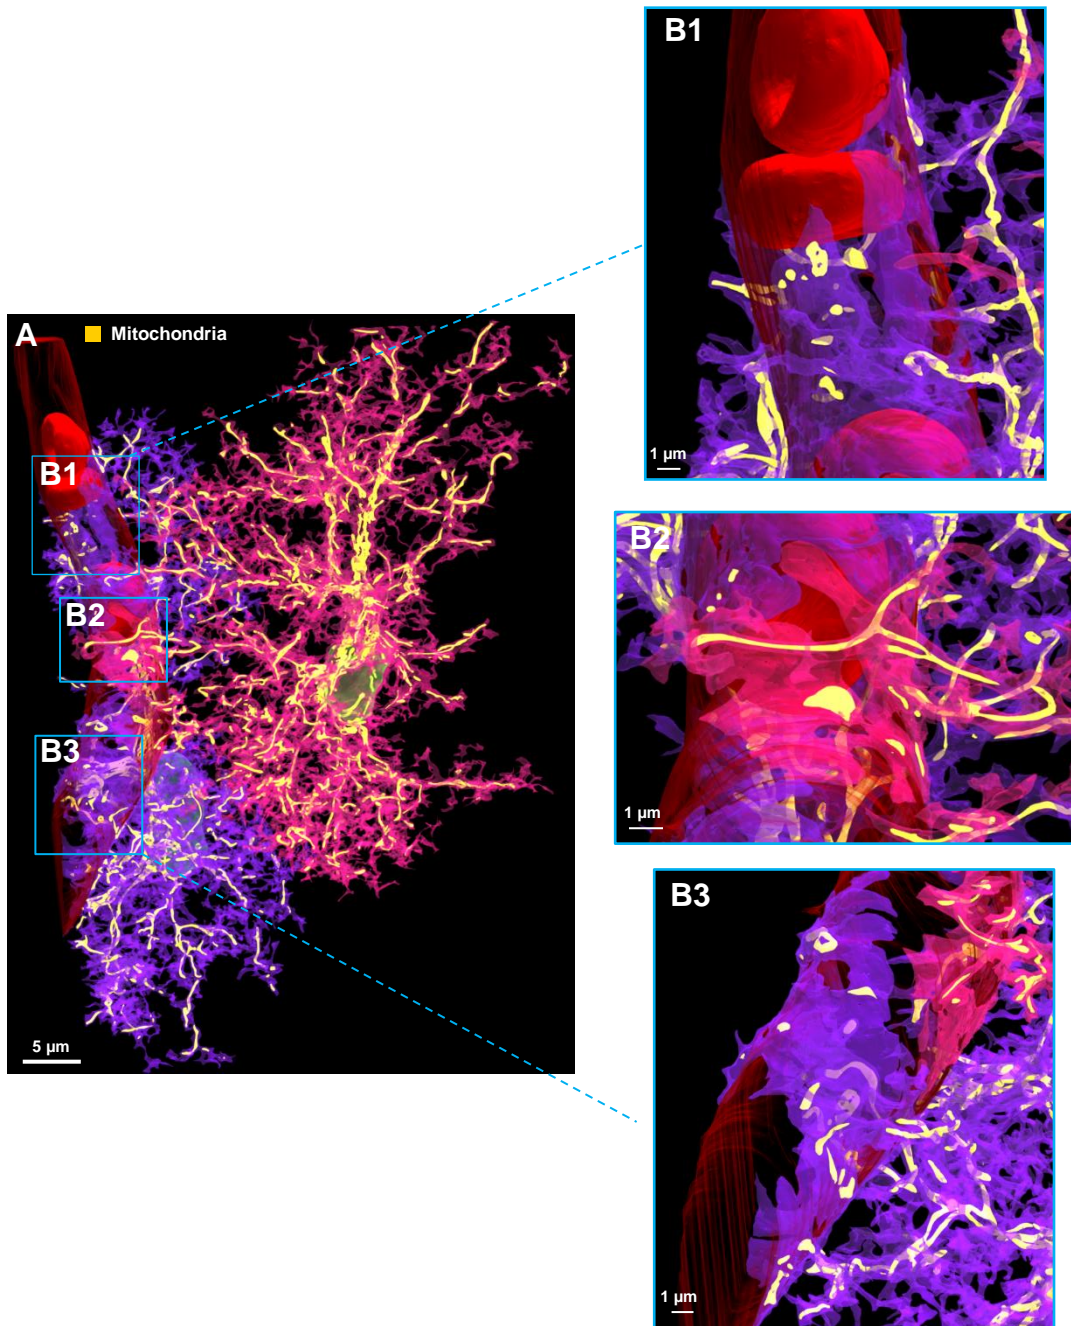

**Figure S9**, Aten et al., 2021

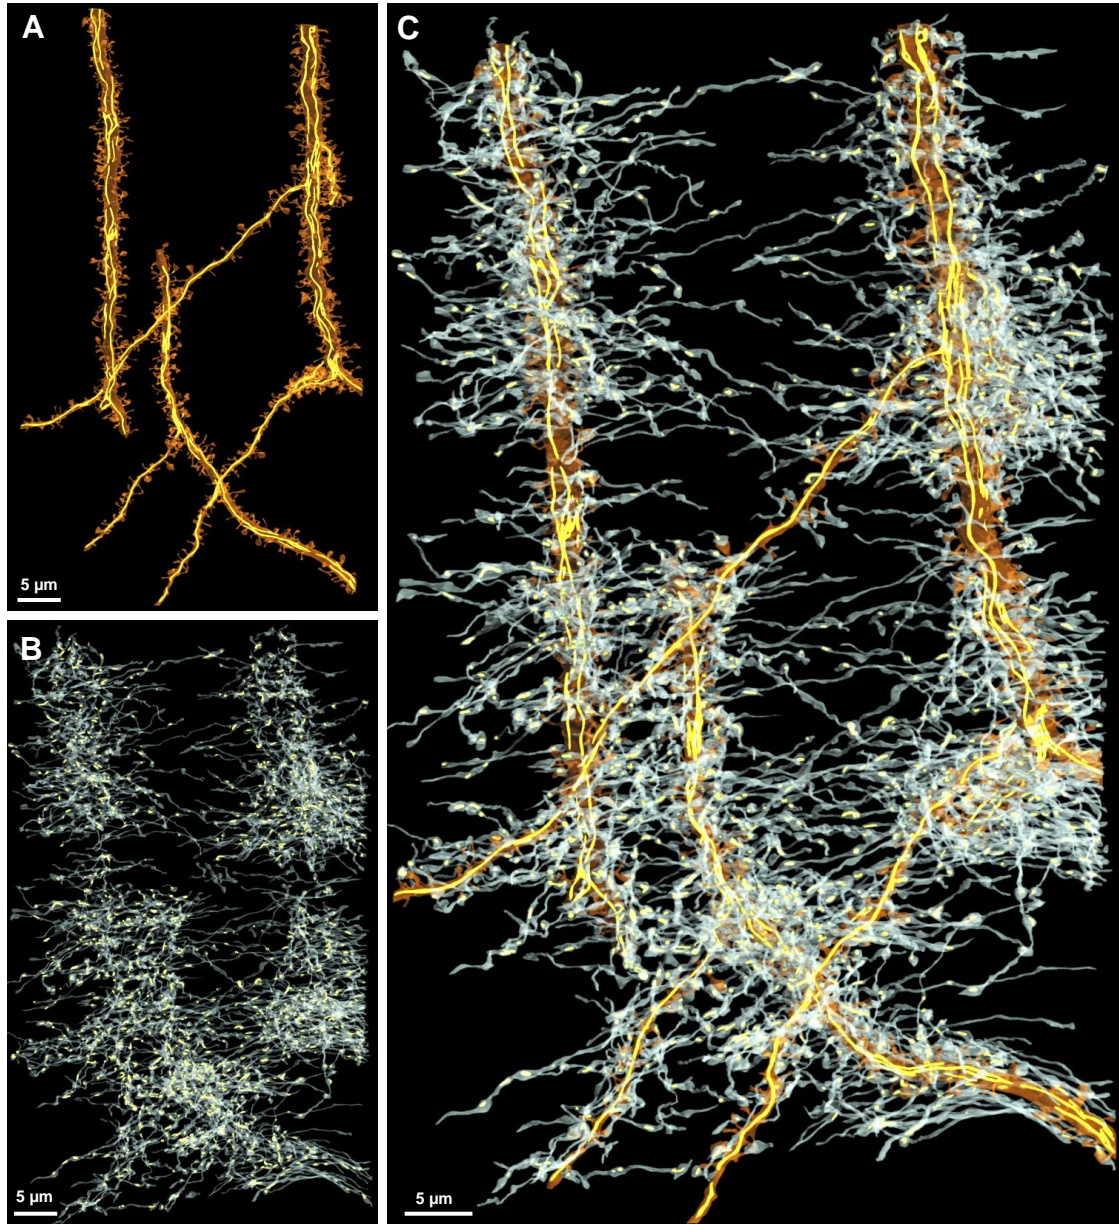

**Figure S10**, Aten et al., 2021
